# Supplementary material for: Fever control interventions versus placebo, sham or no intervention in adults: a protocol for a systematic review with meta-analysis and Trial Sequential Analysis
Source: PubMed Central journal article supplement — BMJ Open. 2019 Nov 3;9(11):e032389. doi: 10.1136/bmjopen-2019-032389 (PMC6858094; doi:10.1136/bmjopen-2019-032389), 2019-11-03
Supplement: bmjopen-2019-032389supp001.pdf [file bmjopen-2019-032389supp001.pdf]

## PRISMA-P 2015 Checklist

| Section/topic                       | #  | Checklist item                                                                                                                                                                                                            | Information reported                |                                     | Line number(s) |
|-------------------------------------|----|---------------------------------------------------------------------------------------------------------------------------------------------------------------------------------------------------------------------------|-------------------------------------|-------------------------------------|----------------|
|                                     |    |                                                                                                                                                                                                                           | Yes                                 | No                                  |                |
| <b>ADMINISTRATIVE INFORMATION 1</b> |    |                                                                                                                                                                                                                           |                                     |                                     |                |
| <b>Title</b>                        |    |                                                                                                                                                                                                                           |                                     |                                     |                |
| Identification                      | 1a | Identify the report as a protocol of a systematic review                                                                                                                                                                  | <input checked="" type="checkbox"/> | <input type="checkbox"/>            | 2              |
| Update                              | 1b | If the protocol is for an update of a previous systematic review, identify as such                                                                                                                                        | <input type="checkbox"/>            | <input checked="" type="checkbox"/> |                |
| <b>Registration</b>                 | 2  | If registered, provide the name of the registry (e.g., PROSPERO) and registration number in the Abstract                                                                                                                  | <input checked="" type="checkbox"/> | <input type="checkbox"/>            | 54             |
| <b>Authors</b>                      |    |                                                                                                                                                                                                                           |                                     |                                     |                |
| Contact                             | 3a | Provide name, institutional affiliation, and e-mail address of all protocol authors; provide physical mailing address of corresponding author                                                                             | <input checked="" type="checkbox"/> | <input type="checkbox"/>            | 4-22           |
| Contributions                       | 3b | Describe contributions of protocol authors and identify the guarantor of the review                                                                                                                                       | <input checked="" type="checkbox"/> | <input type="checkbox"/>            | 803-805        |
| <b>Amendments</b>                   | 4  | If the protocol represents an amendment of a previously completed or published protocol, identify as such and list changes; otherwise, state plan for documenting important protocol amendments                           | <input type="checkbox"/>            | <input checked="" type="checkbox"/> |                |
| <b>Support</b>                      |    |                                                                                                                                                                                                                           |                                     |                                     |                |
| Sources                             | 5a | Indicate sources of financial or other support for the review                                                                                                                                                             | <input checked="" type="checkbox"/> | <input type="checkbox"/>            | 806-808        |
| Sponsor                             | 5b | Provide name for the review funder and/or sponsor                                                                                                                                                                         | <input checked="" type="checkbox"/> | <input type="checkbox"/>            | 806-808        |
| Role of sponsor/funder              | 5c | Describe roles of funder(s), sponsor(s), and/or institution(s), if any, in developing the protocol                                                                                                                        | <input checked="" type="checkbox"/> | <input type="checkbox"/>            | 806-808        |
| <b>INTRODUCTION</b>                 |    |                                                                                                                                                                                                                           |                                     |                                     |                |
| <b>Rationale</b>                    | 6  | Describe the rationale for the review in the context of what is already known                                                                                                                                             | <input checked="" type="checkbox"/> | <input type="checkbox"/>            | 143-196        |
| <b>Objectives</b>                   | 7  | Provide an explicit statement of the question(s) the review will address with reference to participants, interventions, comparators, and outcomes (PICO)                                                                  | <input checked="" type="checkbox"/> | <input type="checkbox"/>            | 197-200        |
| <b>METHODS</b>                      |    |                                                                                                                                                                                                                           |                                     |                                     |                |
| <b>Eligibility criteria</b>         | 8  | Specify the study characteristics (e.g., PICO, study design, setting, time frame) and report characteristics (e.g., years considered, language, publication status) to be used as criteria for eligibility for the review | <input checked="" type="checkbox"/> | <input type="checkbox"/>            | 205-234        |

| Section/topic                             | #   | Checklist item                                                                                                                                                                                                                              | Information reported                |                          | Line number(s)           |
|-------------------------------------------|-----|---------------------------------------------------------------------------------------------------------------------------------------------------------------------------------------------------------------------------------------------|-------------------------------------|--------------------------|--------------------------|
|                                           |     |                                                                                                                                                                                                                                             | Yes                                 | No                       |                          |
| <b>Information sources</b>                | 9   | Describe all intended information sources (e.g., electronic databases, contact with study authors, trial registers, or other grey literature sources) with planned dates of coverage                                                        | <input checked="" type="checkbox"/> | <input type="checkbox"/> | 263-293                  |
| <b>Search strategy</b>                    | 10  | Present draft of search strategy to be used for at least one electronic database, including planned limits, such that it could be repeated                                                                                                  | <input checked="" type="checkbox"/> | <input type="checkbox"/> | 275                      |
| <b>STUDY RECORDS</b>                      |     |                                                                                                                                                                                                                                             |                                     |                          |                          |
| Data management                           | 11a | Describe the mechanism(s) that will be used to manage records and data throughout the review                                                                                                                                                | <input checked="" type="checkbox"/> | <input type="checkbox"/> | 294-308                  |
| Selection process                         | 11b | State the process that will be used for selecting studies (e.g., two independent reviewers) through each phase of the review (i.e., screening, eligibility, and inclusion in meta-analysis)                                                 | <input checked="" type="checkbox"/> | <input type="checkbox"/> | 298-308                  |
| Data collection process                   | 11c | Describe planned method of extracting data from reports (e.g., piloting forms, done independently, in duplicate), any processes for obtaining and confirming data from investigators                                                        | <input checked="" type="checkbox"/> | <input type="checkbox"/> | 309-317                  |
| <b>Data items</b>                         | 12  | List and define all variables for which data will be sought (e.g., PICO items, funding sources), any pre-planned data assumptions and simplifications                                                                                       | <input checked="" type="checkbox"/> | <input type="checkbox"/> | 318-335                  |
| <b>Outcomes and prioritization</b>        | 13  | List and define all outcomes for which data will be sought, including prioritization of main and additional outcomes, with rationale                                                                                                        | <input checked="" type="checkbox"/> | <input type="checkbox"/> | 235-262                  |
| <b>Risk of bias in individual studies</b> | 14  | Describe anticipated methods for assessing risk of bias of individual studies, including whether this will be done at the outcome or study level, or both; state how this information will be used in data synthesis                        | <input checked="" type="checkbox"/> | <input type="checkbox"/> | 336-412                  |
| <b>DATA</b>                               |     |                                                                                                                                                                                                                                             |                                     |                          |                          |
| <b>Synthesis</b>                          | 15a | Describe criteria under which study data will be quantitatively synthesized                                                                                                                                                                 | <input checked="" type="checkbox"/> | <input type="checkbox"/> | 457-476                  |
|                                           | 15b | If data are appropriate for quantitative synthesis, describe planned summary measures, methods of handling data, and methods of combining data from studies, including any planned exploration of consistency (e.g., $I^2$ , Kendall's tau) | <input checked="" type="checkbox"/> | <input type="checkbox"/> | 413-522                  |
|                                           | 15c | Describe any proposed additional analyses (e.g., sensitivity or subgroup analyses, meta-regression)                                                                                                                                         | <input checked="" type="checkbox"/> | <input type="checkbox"/> | 523-586                  |
|                                           | 15d | If quantitative synthesis is not appropriate, describe the type of summary planned                                                                                                                                                          | <input checked="" type="checkbox"/> | <input type="checkbox"/> | 476                      |
| <b>Meta-bias(es)</b>                      | 16  | Specify any planned assessment of meta-bias(es) (e.g., publication bias across studies, selective reporting within studies)                                                                                                                 | <input checked="" type="checkbox"/> | <input type="checkbox"/> | 389 – 396<br>AND 449-456 |
| <b>Confidence in cumulative evidence</b>  | 17  | Describe how the strength of the body of evidence will be assessed (e.g., GRADE)                                                                                                                                                            | <input checked="" type="checkbox"/> | <input type="checkbox"/> | 587-602                  |
