# Supplementary material for: Fever control interventions versus placebo, sham or no intervention in adults: a protocol for a systematic review with meta-analysis and Trial Sequential Analysis
Source: PubMed Central journal article supplement — BMJ Open. 2019 Nov 3;9(11):e032389. doi: 10.1136/bmjopen-2019-032389 (PMC6858094; doi:10.1136/bmjopen-2019-032389), 2019-11-03
Supplement: bmjopen-2019-032389supp002.pdf [file bmjopen-2019-032389supp002.pdf]

## Additional file 2

### Search strategy for MEDLINE (Ovid)

1. exp Fever/
4. exp Infection/
5. exp Sepsis/
6. exp Temperature/
8. (fever or pyrexia or febrile or infection or sepsis or temperature or hyperthermia).mp. [mp=title, abstract, original title, name of substance word, subject heading word, keyword heading word, protocol supplementary concept word, rare disease supplementary concept word, unique identifier]
9. 1 or 2 or 3 or 4 or 5 or 6 or 7 or 8
10. exp Antipyretics/
11. exp Acetaminophen/
12. exp Anti-inflammatory Agents, Non-steroidal/
13. exp Ibuprofen/
14. exp Salicylates/
15. exp Cryotherapy/
16. ("fever control" or antipyretics or antipyresis or paracetamol or acetaminophen or NSAID or "non-steroidal anti-inflammatory drugs" or ibuprofen or "cyclo-oxygenase inhibitors" or "cox-inhibitor" or salicylates or aspirin or diclofenac or naproxen or indomethacin or ketorolac or metamizole or "induced hypothermia" or "targeted temperature management" or cooling or "external cooling" or "surface cooling" or "physical cooling" or "endovascular cooling" or sponges or fan or baths or blanket or ice or fluid).mp. [mp=title, abstract, original title, name of substance word, subject heading word, keyword heading word, protocol supplementary concept word, rare disease supplementary concept word, unique identifier]
17. 10 or 11 or 12 or 13 or 14 or 15 or 16
18. 9 and 17
19. exp Clinical trial/
20. (randomized or randomised or clinical or controlled or placebo or "no intervention" or sham or trial or systematic review or meta-analysis).mp. [mp=title, abstract, original title, name of substance word, subject heading word, keyword heading word, protocol supplementary concept word, rare disease supplementary concept word, unique identifier]
21. 19 or 20

20. 18 and 21
